# Supplementary material for: Effects of Osthole on Inflammatory Gene Expression and Cytokine Secretion in Histamine-Induced Inflammation in the Caco-2 Cell Line
Source: MDPI journal article supplement (doi:10.3390/ijms222413634), 2021-12-20
Supplement: s1 [file s1]

**Table S1.** Sequences of the oligonucleotide primers specific to examined genes

**Figure S1.** Changes in viability of the Caco-2 cell line after incubation with histamine (A), osthole (B) and fexofenadine (C). The symbols show the mean and the bars depict the standard deviation. Statistically significant differences compared to control – cells cultured in medium ( $p < 0.05$ , Two-way ANOVA with Dunnet's multiple comparisons test), are shown in rectangles with dotted edges. Analyzes were performed in triplicate in three independent experiments

**Figure S2.** Level of pro- and anti-inflammatory CKs after 24 h of incubation with histamine (A), osthole (B) and fexofenadine (C). The horizontal line shows mean and the bars depict standard deviation. Statistically significant differences (Two-way ANOVA with Tukey's multiple comparisons test) compared to control (\* -  $p < 0.05$ , \*\* -  $p < 0.01$ , \*\*\* -  $p < 0.001$ , \*\*\*\* -  $p < 0.0001$ ) are marked

**Figure S3.** Level of pro-inflammatory CKs after incubation with histamine (50, 100, and 150 ng/mL) alone and in mixtures with osthole (A,C,E) and fexofenadine (B,D,F) for 24 h. The horizontal line shows mean and the bars depict standard deviation. Statistically significant differences (Two-way ANOVA with Tukey's multiple comparisons test) compared to control (\*\* -  $p < 0.01$ , \*\*\* -  $p < 0.001$ , \*\*\*\* -  $p < 0.0001$ ) and to cells treated with histamine (# -  $p < 0.05$ , ## -  $p < 0.01$ , ### -  $p < 0.001$ , #### -  $p < 0.0001$ ) are marked; ns – non-significant

**Figure S4.** Level of anti-inflammatory CKs after incubation with histamine (50, 100, and 150 ng/mL) alone and in mixtures with osthole (A,C,E) and fexofenadine (B,D,F) for 24 h. The horizontal line shows mean and the bars depict standard deviation. Statistically significant differences (Two-way ANOVA with Tukey's multiple comparisons test) compared to control (\*\*\*\* -  $p < 0.0001$ ) and to cells treated with histamine (#### -  $p < 0.0001$ ) are marked; ns – non-significant

**Figure S5.** Expression level of *HRH1*, *HRH4*, *IL1R1*, *IL4R*, *NFκB*, and *COX-2* after 24 h of incubation with histamine (A) osthole (B) and fexofenadine (C). The horizontal line shows mean and the bars depict standard deviation. Statistically significant differences (Two-way ANOVA with Tukey's multiple comparisons test) compared to control (\*\*\* -  $p < 0.001$ , \*\*\*\* -  $p < 0.0001$ ) are marked

**Figure S6.** Expression level of *IL1R1*, *NFκB*, and *COX-2* after incubation with histamine (50, 100, and 150 ng/mL) alone and in mixtures with osthole (A,C,E) and fexofenadine (B,D,F) for 24 h. The horizontal line shows mean and the bars depict standard deviation. Statistically significant differences (Two-way ANOVA with Tukey's multiple comparisons test) compared to control (\*\*\*\* -  $p < 0.0001$ ) and to cells treated with histamine (# -  $p < 0.05$ , ## -  $p < 0.01$ , ### -  $p < 0.001$ , #### -  $p < 0.0001$ ) are marked; ns – non-significant.
