# Supplementary material for: Effects of Osthole on Inflammatory Gene Expression and Cytokine Secretion in Histamine-Induced Inflammation in the Caco-2 Cell Line
Source: MDPI journal article supplement (doi:10.3390/ijms222413634), 2021-12-20
Supplement: s1 [file s1]

1

**Table S1.** Sequences of the oligonucleotide primers specific to examined genes.

| Gene         | Sequence                                                         | Product<br>length (bp) |
|--------------|------------------------------------------------------------------|------------------------|
| <i>ACTB</i>  | F: 5'-TCCCTGGAGAAGAGCTACGA-3'<br>R: 5'-AGCACTGTGTTGGCGTACAG-3'   | 194                    |
| <i>HRH1</i>  | F: 5'-GCCGAGAGGACAAGTGTGA-3'<br>R: 5'-GGAGACTCCTTCCCTGGTTT-3'    | 244                    |
| <i>HRH4</i>  | F: 5'-ACTCTGATGGTGGCCGTTT-3'<br>R: 5'-TCAGTCCAGGATGGCTTTG-3'     | 250                    |
| <i>IL1R1</i> | F: 5'-GACAGGGCCTAGCTTTCATTT-3'<br>R: 5'-TGGCCAATTTTGTCACTAACC-3' | 204                    |
| <i>IL4R</i>  | F: 5'-TCATGGATGACGTGGTCAGT-3'<br>R: 5'-GTGTCGGAGACATTGGTGTG-3'   | 148                    |
| <i>NFκB</i>  | F: 5'-TGGAGTCTGGGAAGGATTTG-3'<br>R: 5'-CGAAGCTGGACAAACACAGA-3'   | 129                    |
| <i>COX-2</i> | F: 5'-TGGCTACAAAAGCTGGGAAG-3'<br>R: 5'-GCTGCTTTTACCTTTGACACC-3'  | 110                    |

2
